# Supplementary material for: Association between Social Support and Depressive Symptoms in Informal Caregivers of Adult and Older Dependents: A Systematic Review and Meta-Analysis
Source: MDPI journal article supplement (doi:10.3390/jcm12206468), 2023-10-11

FOREST PLOTS FOR SUBGROUP ANALYSES

Forest plot for subgroups by design

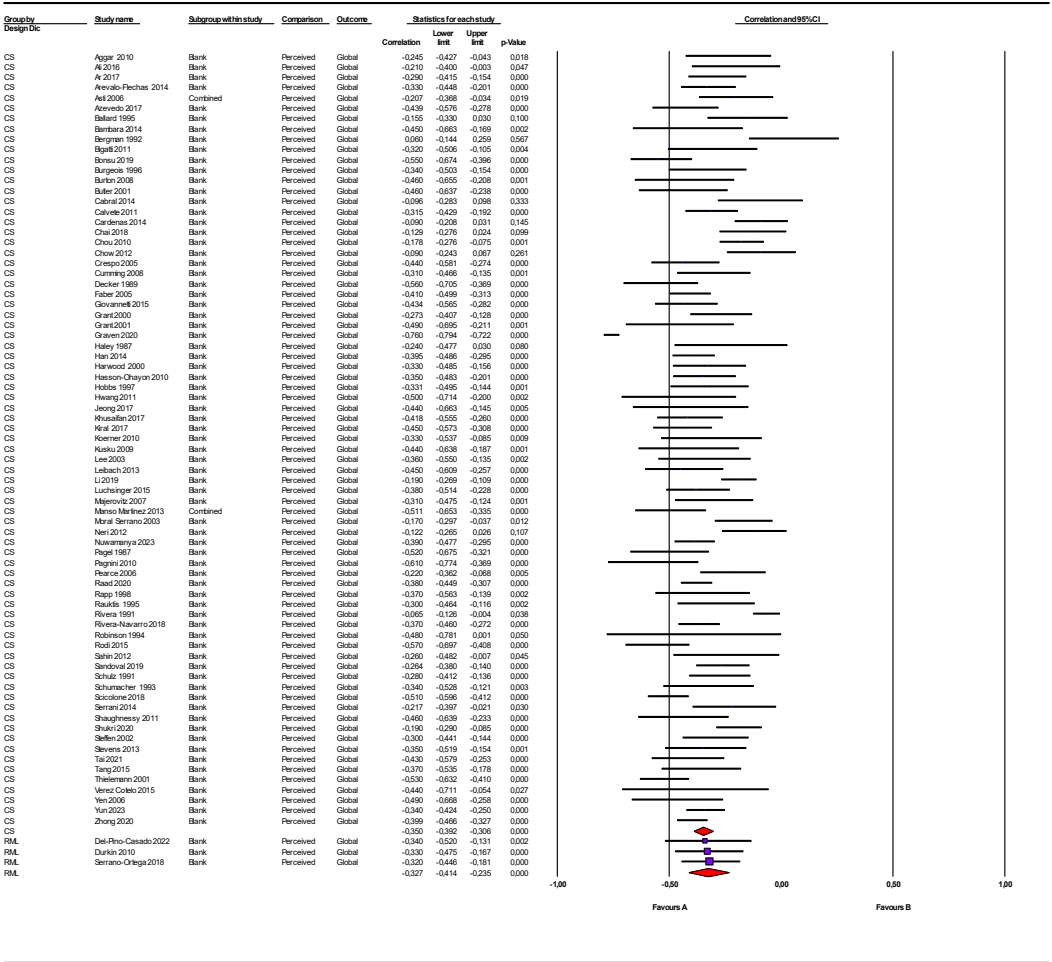

Abbreviations: CS: cross-sectional design or repeated measures design with cross-sectional correlations; RML: longitudinal (repeated measures design with longitudinal correlations).

# Forest plot for subgroups by sampling

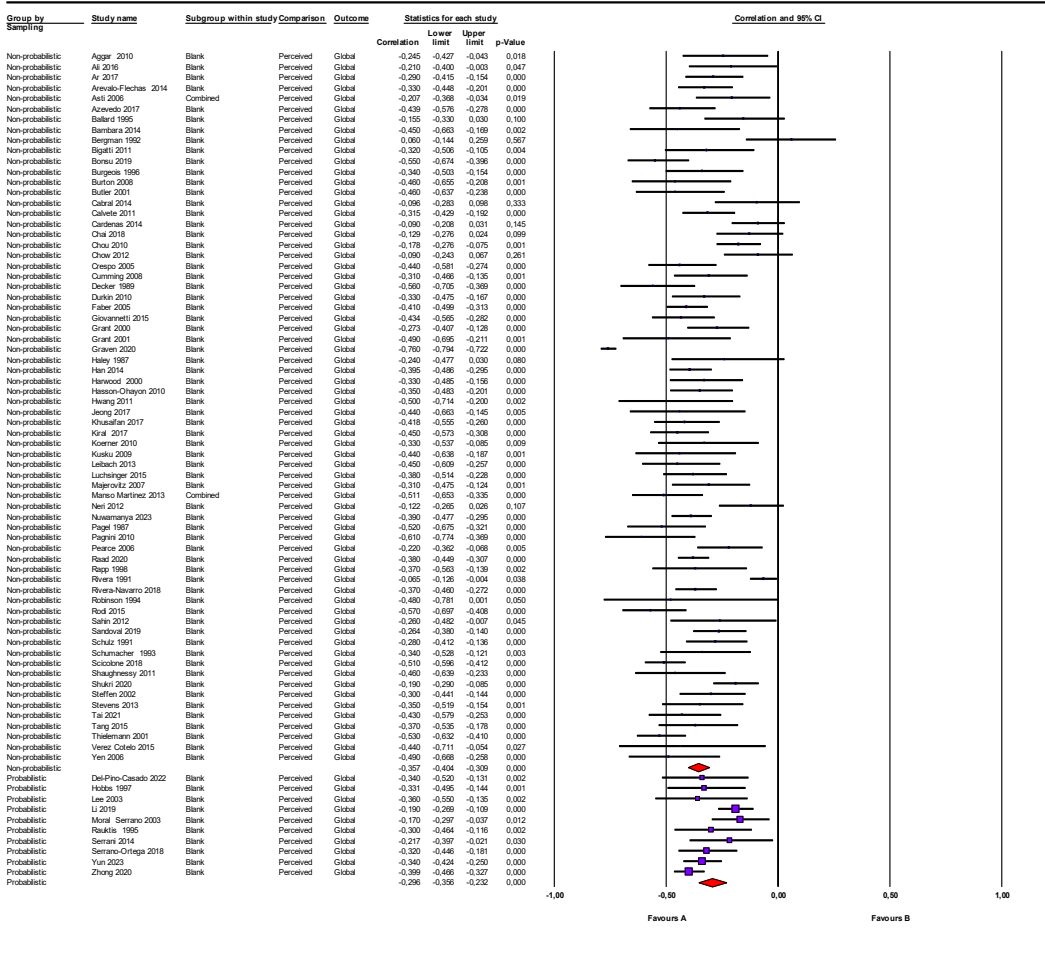

Forest plot for subgroups by control of confounders

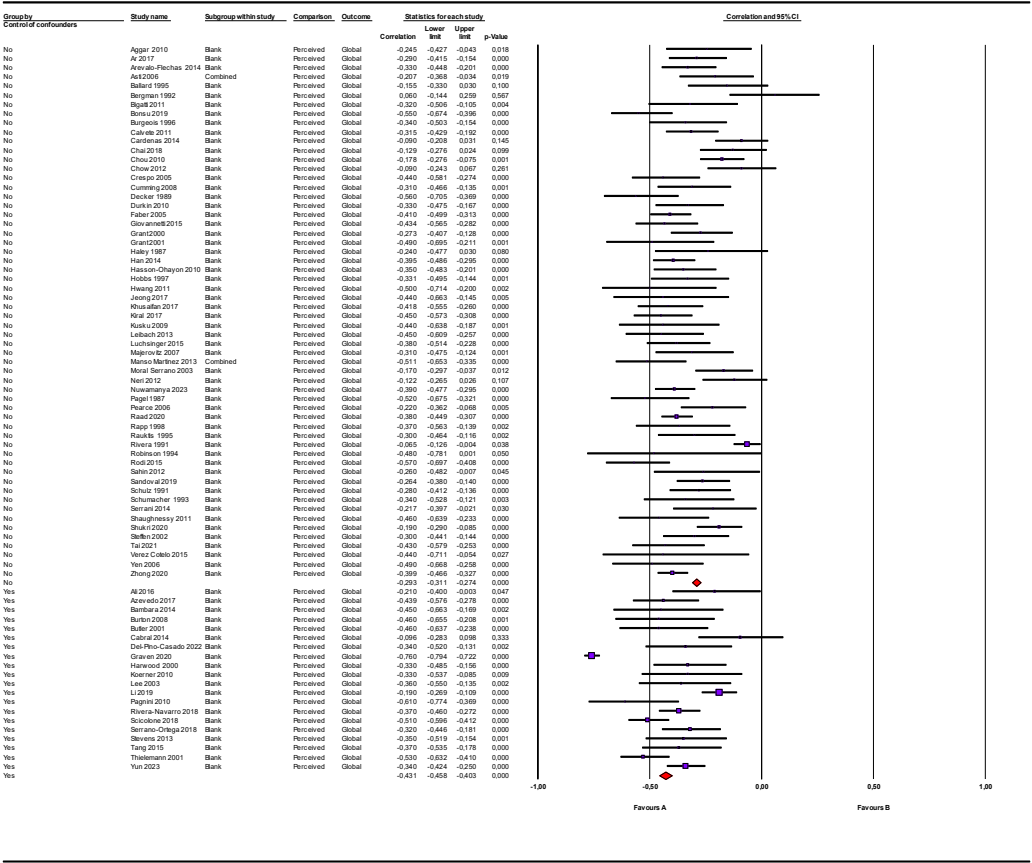

Forest plot for subgroups by care recipient

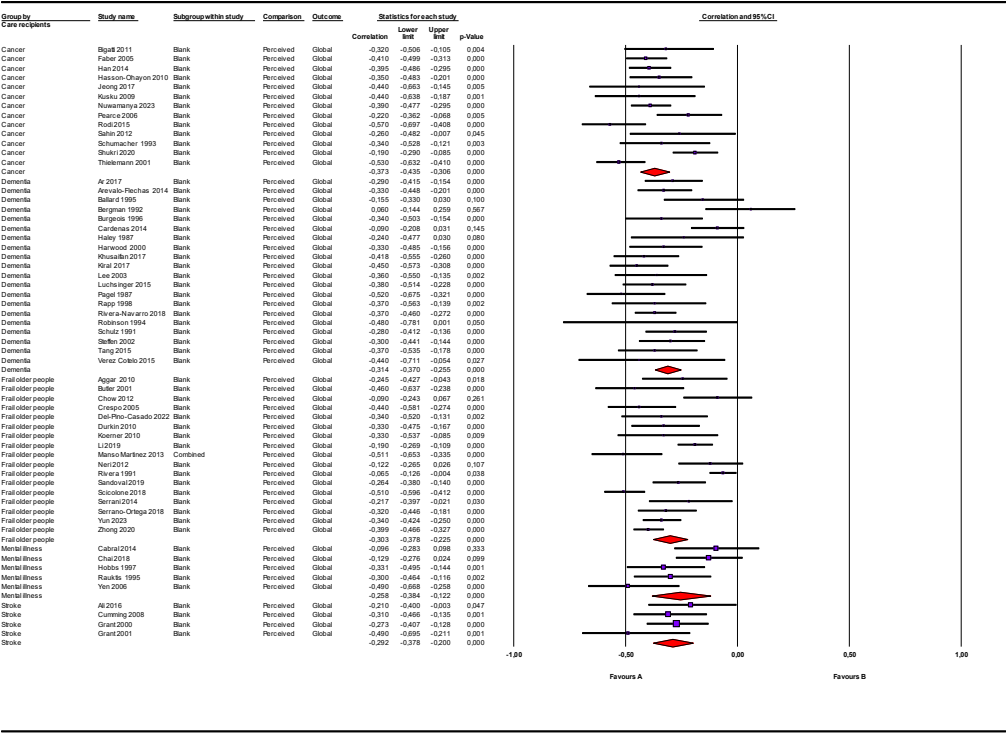

Supplement: s1 [file s1]
