# Supplementary material for: Association between Social Support and Depressive Symptoms in Informal Caregivers of Adult and Older Dependents: A Systematic Review and Meta-Analysis
Source: MDPI journal article supplement (doi:10.3390/jcm12206468), 2023-10-11

SCATTERPLOTS FOR META-REGRESSIONS

Scatterplots for perceived social support

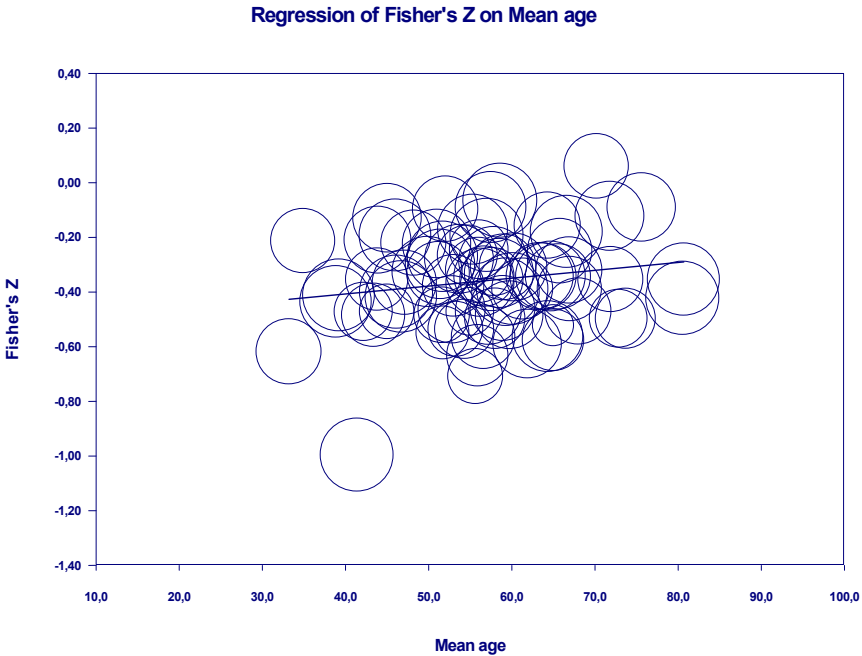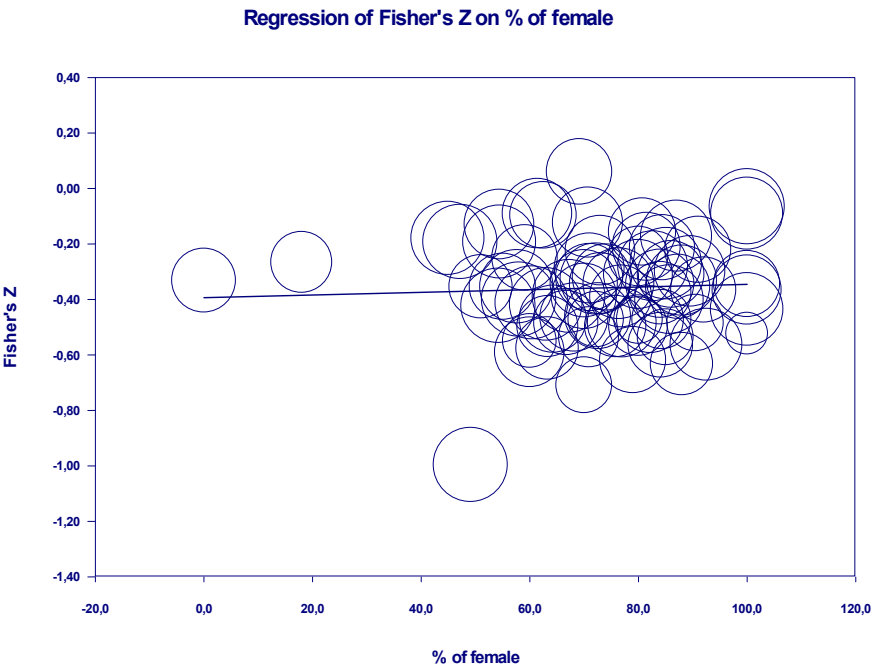

Scatterplots for received social support

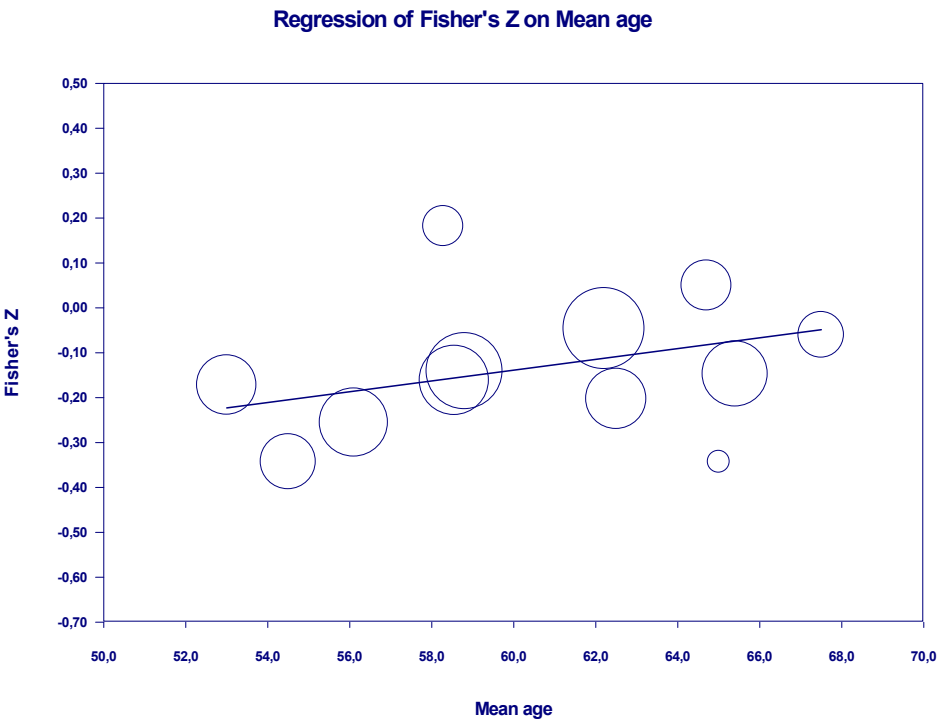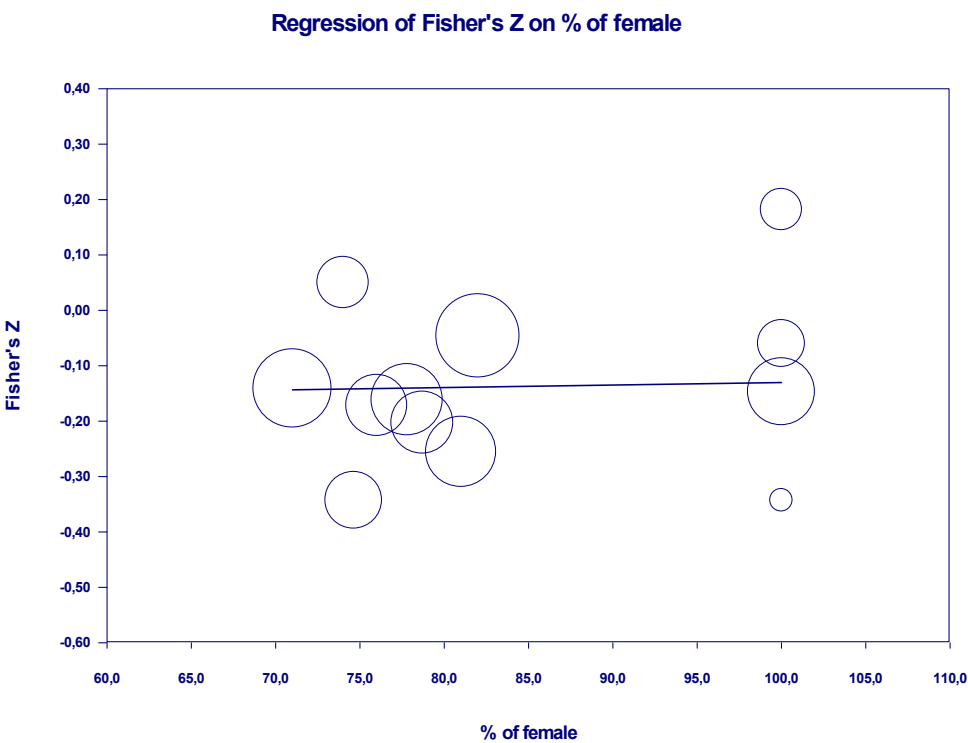

Supplement: s1 [file s1]
