# Supplementary material for: Association between Social Support and Depressive Symptoms in Informal Caregivers of Adult and Older Dependents: A Systematic Review and Meta-Analysis
Source: MDPI journal article supplement (doi:10.3390/jcm12206468), 2023-10-11
Supplement: s1 [file s1]

**Table S1:** Summary of the search strategy used in the databases

| Database | Search string                                                                                                                                                                                                                                                                                                                                                                                                                                                  | Date                  | Sample |
|----------|----------------------------------------------------------------------------------------------------------------------------------------------------------------------------------------------------------------------------------------------------------------------------------------------------------------------------------------------------------------------------------------------------------------------------------------------------------------|-----------------------|--------|
| Pubmed   | ((Depression[mj] OR ((Depress*[tiab]) NOT MEDLINE[sb])) AND (Caregivers[mj] OR ((Caregiv*[tiab] OR Care giv*[tiab] OR Carer*[tiab]) NOT MEDLINE[sb])) AND (Social support[mh:noexp] OR ((social network[tiab] OR informal support[tiab] OR received support[tiab] OR perceived support[tiab]) NOT MEDLINE[sb]))) NOT (clinical trial[pt] OR randomized clinical trial[tiab] OR randomized controlled trial[tiab] OR qualitative study OR qualitative research) | 15<br>January<br>2023 | 241    |
| CINAHL   | (MJ Depression OR Depress*) AND (MJ Caregivers OR AB Caregiv* OR AB Care giv* OR AB Carer*) AND (MJ social support OR AB social network OR AB informal support OR AB received support OR AB perceived support) NOT (PT clinical trial OR AB randomized clinical trial OR randomized controlled trial OR RCT OR qualitative study OR qualitative research)                                                                                                      | 15<br>January<br>2023 | 394    |
| PsyInfo  | (MJSUB(Depression) AND MJSUB(Caregivers) AND MJSUB(social support)) NOT (PT(clinical trial) OR AB("randomized clinical trial") OR AB("randomized controlled trial") OR AB(RCT) OR AB("Qualitative study") OR AB("qualitative research") OR AB("systematic review") OR AB("experimental research") OR TI("Qualitative study") OR TI("qualitative research") OR TI("systematic review") OR TI("experimental research") OR SU(support groups))                    | 15<br>January<br>2023 | 351    |
| Scopus   | Depression(mj) AND Caregivers(mj) AND ("social support" OR "social network" OR "informal support" OR "received support" OR "perceived support")                                                                                                                                                                                                                                                                                                                | 15<br>January<br>2023 | 2,495  |
